# Supplementary material
Source: PubMed Central journal article supplement (PMC3490580)
Supplement: supp_pp.112.204743_204753Supplementary_Files.pdf [file supp_pp.112.204743_204753Supplementary_Files.pdf]

**Table S1.** Putative transcriptional factor (TF) binding sites and their positions in the promoters of *De18* and *de18*.

| <i>De18</i> |           | <i>de18</i> |          |       |
|-------------|-----------|-------------|----------|-------|
| TF          | Site      | TF          | Site     |       |
| Dof core    | -86       | Dof core    | -139     |       |
|             | -148      |             | -231     |       |
|             | -173      |             | -293     |       |
|             | -189      |             | -464     |       |
|             | -207      |             | -475     |       |
|             | -319      |             | -497     |       |
|             | -330      |             | -582     |       |
|             | -345      |             | -725     |       |
|             | -354      |             | -749     |       |
|             | -379      |             | -757     |       |
|             | -467      |             | -1130    |       |
|             | -493      |             | Opaque-2 | -422  |
|             | -590      |             |          | -559  |
|             | -733      |             |          | -1150 |
| -757        | Q-element | -622        |          |       |
| -765        |           |             |          |       |
| -1030       |           |             |          |       |
| -1131       |           |             |          |       |
| -1142       |           |             |          |       |
| Opaque-2    | -277      |             |          |       |
|             | -531      |             |          |       |
|             | -567      |             |          |       |
| Q-element   | -630      |             |          |       |

**Table S2.** Primers and gene accession numbers for qRT-PCR.

| <b>Gene Name</b> | <b>Accession #</b> | <b>Forward Primer</b>     | <b>Reverse Primer</b>    |
|------------------|--------------------|---------------------------|--------------------------|
| <i>Mn1</i>       | AF165179           | ACGGACATCTCGAACGGCAAGATA  | CGTTCATGACCGGCTTCTTCATCT |
| <i>ZmTar1</i>    | BT016739           | ACTCTCAACTTCGTGCCGCTAAGA  | CCTTGTTGTAGCGAAGCCATGCAA |
| <i>ZmAlliin1</i> | EU968410           | GCTACTGCAACTTCGCCAAGCAAA  | GTTGTCCCTGTCCAGCATGTTGAT |
| <i>ZmVt2</i>     | BT085859           | TGGCCAAGTTCATCGAGCTCAACA  | TTCCTTGGTGAAGTTGCAGAAGGC |
| <i>ZmYuc1</i>    | DQ995287           | TTATCCGTAGCCCGGTGCATGTTA  | TCCACTGTGTTTCCTCTGATGCGA |
| <i>ZmARF28</i>   | HM004543           | TGAGCCTTGTTTCAGAAGCTACCCA | TAGACGACCAACCAGTTCCTGCAA |

**Table S3.** Overlapping primers used for *Yuc* gene amplification of *De18* genotypes (B37, B73 and A69Y) and *de18* mutant.

| NAME                         | SEQUENCE                                            | AMPLICON LENGTH |
|------------------------------|-----------------------------------------------------|-----------------|
| YUC1F<br>YUC1R               | GCCCCCTAGCAAAAAGAAAA<br>GCCTCATGCCCAAGTAAATC        | 278 bp          |
| YUC2F<br>YUC2R               | ACCTTCCCGTGAAACTTGTG<br>TGTGCCAACGTCTAGGACAG        | 152 bp          |
| YUC3F<br>YUC3R               | TCGCATCAGAGGAAACACAG<br>CCTGCCAGAGCATTTTTGAT        | 280 bp          |
| YUC4F<br>YUC4R               | GTGGGAGCTTGCTAGACGAC<br>ATTCTTCACTCCGTCCATGC        | 271 bp          |
| YUC_EX1F<br>YUC_EX1R         | GAGAAGGTGCTAGTTCTGATCGTT<br>GACCAAGAACCTGGTCGTGTACT | 402 bp          |
| YUC_EX1INT1F<br>YUC_EX1INT1R | CAGAGCGCGTGACCTAGC<br>TGTTATATGTGTGCCTGTAGATATGC    | 412 bp          |
| YUC_EX3INT3F<br>YUC_EX3INT3R | CTGGCGATATCAAGGTGAGC<br>ATGCGTGCGTGTAACAACACT       | 461 bp          |

**Table S4.** Primers used for *yuc* promoter amplification of *De18* and *de18* maize genotypes.

| NAME                             | SEQUENCE                                         | AMPLICON LENGTH | TARGET DNA                  |
|----------------------------------|--------------------------------------------------|-----------------|-----------------------------|
| YUC_PROM_UP4_F<br>YUC_PROM_UP4_R | TGCTTCATCCTGCTCCCTAT<br>GGCGTATTGGATATGGCAGT     | 492 bp          | <i>De18</i> and <i>de18</i> |
| YUC_PROM_UP3_F<br>YUC_PROM_UP3_R | CACATCAACTTGACGGAAGG<br>CAGCCCCTGAGCATTGTATT     | 335 bp          | <i>De18</i> and <i>de18</i> |
| YUCPROM_UP F<br>YUCPROM_UP R     | GAACAAAAGGATCTCTAGCCACA<br>TGTGGGGTTCCATTCAAAGT  | 314 bp          | <i>De18</i>                 |
| YUCPROM_DOWN F<br>YUCPROM_DOWN R | TGGAACCCCACTAAGGTT<br>TGGATGGGAAAGATGTTGGT       | 500 bp          | <i>De18</i>                 |
| YUCPROM3 F<br>YUCPROM3 R         | AAGGCACACGAGAATTTGATCT<br>ACTCATTGCTAGAACAACCACA | 278 bp          | <i>de18</i>                 |
| YUC_PROM_UP2_F<br>YUC_PROM_UP2_R | ATGGGAGCATAAGGTGTTGC<br>TGTCATTAATTGAGGTGGATGG   | 352 bp          | <i>de18</i>                 |
| YUCPROM1 F<br>YUCPROM1 R         | GGAAGATTCCATCCACCTCA<br>GGGCTATGTGCATTGACGTAT    | 249 bp          | <i>de18</i>                 |
| YUCTATA F<br>YUCTATA R           | AATGCACATAGCCCTGCTGT<br>GCACCAACGATCAGAACTAGC    | 158 bp          | <i>de18</i>                 |

**Figure S1.** (A) cDNA sequences of the two *Yuc1* alleles in *De18* and *de18* endosperm, and (B) predicted amino acid sequences for the YUCCA protein in *De18* and *de18* endosperm (*ZmYuc1-De18* is 400aa and *ZmYuc1-de18* is 212aa).

(A)

|                    |                                                                       |     |
|--------------------|-----------------------------------------------------------------------|-----|
| <i>ZmYuc1-De18</i> | ATGACGGAGAAGGTGCTAGTTCTGATCGTTGGTGCAGGTCCATCAGGCCTTGCTGTAGCA          | 60  |
| <i>ZmYuc1-de18</i> | ATGACGGAGAAGGTGCTAGTTCTGATCGTTGGCGCAGGTCCATCAGGCCTTGCTGTAGCA          | 60  |
|                    | *****                                                                 |     |
| <i>ZmYuc1-De18</i> | GCATGCCTCGGCGAGCACGGCATCCCGTACCACATTGTGGAGCGCGAGGACTGCAGCGCT          | 120 |
| <i>ZmYuc1-de18</i> | GCATGCCTCGGCGAGCACGGCGTCCCGTACCACATTGTGGAGCGCGAGGACTGCAGCGCT          | 120 |
|                    | *****                                                                 |     |
| <i>ZmYuc1-De18</i> | TCGCTGTGGCGCAAACGCACGTACGATCGCCTCAAACCTCCACCTCGCCAAGGAGTTCTGC         | 180 |
| <i>ZmYuc1-de18</i> | TCGCTGTGGCGCAAACGCACGTACGATCGCCTCAAACCTCCACCTCGCCAAGGAGTTCTGC         | 180 |
|                    | *****                                                                 |     |
| <i>ZmYuc1-De18</i> | GAGCTCCCTCGCATGTGCGATCCGAGCGACGCCCCAAGTACATCACGAGGGAGCAGTTC           | 240 |
| <i>ZmYuc1-de18</i> | GAGCTCCCTCGCATGTGCGATCCGAGCGACGCCCCAAGTACATCACGAGGGAGCAGTTC           | 240 |
|                    | *****                                                                 |     |
| <i>ZmYuc1-De18</i> | GTGAGGTACGTCGACGACTACGTCGAGCGCTTCAACATCCTCCCCAGGTACAGCACCTCG          | 300 |
| <i>ZmYuc1-de18</i> | GTGAGGTACGTCGACGACTACGTCGAGCGCTTCAACATCCTCCCCAGGTACAGCACCTCG          | 300 |
|                    | *****                                                                 |     |
| <i>ZmYuc1-De18</i> | GTCGAGTCCTGCGAGTACGACGAGGCCAGCGGCCGCTGGGACGTCAGAGCGCGTGACCTA          | 360 |
| <i>ZmYuc1-de18</i> | GTCGAGTCCTGCGAGTACGACGAGGCCAGCGGCCGCTGGGACGTCAGAGCGCGTGACCTA          | 360 |
|                    | *****                                                                 |     |
| <i>ZmYuc1-De18</i> | GCGGACGGCGGGCGGCCGAGTGGCCGAGTACACGGCCAGGTTCTTGGTCGTAGCCACCGGC         | 420 |
| <i>ZmYuc1-de18</i> | GCGGACGGCGGGCGGCCGAGTGGCCGAGTACACGACCAGGTTCTTGGTCGTAGCCACCGGC         | 420 |
|                    | *****                                                                 |     |
| <i>ZmYuc1-De18</i> | GAGAACTGCGAGGGTGTGCATCCCGGATATCCCTGGCCTGCGCGATTTCCCGGCTGGTGAG         | 480 |
| <i>ZmYuc1-de18</i> | GAGAACTGCGAGGGAGTGCATCCCGGATATCCCTGGGCTGCGCGATTTCCCGGCTGGTGAG         | 480 |
|                    | *****                                                                 |     |
| <i>ZmYuc1-De18</i> | GTCGTGCACTCGTCGAGCTACAAATCGTGGAAGAACTATGCCGGGAAGAGAG--TCCTGG          | 538 |
| <i>ZmYuc1-de18</i> | GTCGTGCACTCGTCGAGCTACAAGTCGTGGAAGAACTATGCCGGGAAGAGAG <b>AG</b> TCCTGG | 540 |
|                    | *****                                                                 |     |
| <i>ZmYuc1-De18</i> | TGGTTGGGTGTGGCAACTCTGGCATGGAGATTGCATATGATCTTGCCTACAATGGAGTGG          | 598 |
| <i>ZmYuc1-de18</i> | TGGTTGGGTGTGGCAACTCTGGCATGGAGATTGCATATGATCTTGCCTACAATGGAGTGG          | 600 |
|                    | *****                                                                 |     |
| <i>ZmYuc1-De18</i> | AAACCTCCTTGGTTATCCGTAGCCCGGTGCATGTTATGACCAAGGGTCTGATTTACTTGG          | 658 |
| <i>ZmYuc1-de18</i> | AAACCTCCTTGGTTATCCGTAGCCCGGTGCATGTTATGACCAAGGGTCTGATTTACTTGG          | 660 |
|                    | *****                                                                 |     |
| <i>ZmYuc1-De18</i> | GCATGATGCTGCTGAAATGGCACCTTCCCTGTGAAACTTGTGGACTTCATCATCTTGACCT         | 718 |
| <i>ZmYuc1-de18</i> | GCATGAGGCTGCTGAAATGGCACCTTCCCGTAAACTTGTGGACTTCATCATCTTGACCT           | 720 |
|                    | *****                                                                 |     |
| <i>ZmYuc1-De18</i> | TGGCAAACATCCAGTTCGGTGACCTCTCCCGGTTCCGGCATAGTCAGGCCCGACATGGGCC         | 778 |
| <i>ZmYuc1-de18</i> | TGGCAAACATCCAGTTCGGTGACCTCTCCCGCTACGGCATAGTCAGGCCCGACATGGGCC          | 780 |
|                    | *****                                                                 |     |
| <i>ZmYuc1-De18</i> | CGCTTCTTCTCAAGGCCAAGACTGGCAGGTGAGCGGTCTTAGACGTTGGCACAACCCAGT          | 838 |
| <i>ZmYuc1-de18</i> | CGCTTCTTCTCAAGGCCAAGACTGGCCGGTGGCGGTCTTAGACGTTGGCACAACCCAGT           | 840 |
|                    | *****                                                                 |     |

*ZmYuc1-De18* TAATAAAGACTGGCGATATCAAGGTGGTTGGGGCAATATCTCGCATCAGAGGAAACACAG 898  
*ZmYuc1-de18* TAATAAAGACGGGCGATATCAAGGTGGTTGGGGCGATATCTCGCATCAGAGGAAACACAG 900  
 \*\*\*\*\*

*ZmYuc1-De18* TGGAGTTCGAGGATGGGAAGGAGAGGGACTTCGATTCTCTCGTGTTCGCAACAGGATACA 958  
*ZmYuc1-de18* TGGAGTTCGAGGATGGGAAGGAGAGGGACTTCGATTCTCTCGTGTTCGCAACAGGATACA 960  
 \*\*\*\*\*

*ZmYuc1-De18* GAAGCACTGCGAACACGTGGCTTAAGGACGGTGGGAGCTTGCTAGACGACAATGGCATGC 1018  
*ZmYuc1-de18* GAAGCACTGCGAACACGTGGCTTAAGGACGGTGGGAGCTTGCTAGACGACAATGGCATGC 1020  
 \*\*\*\*\*

*ZmYuc1-De18* CGAAGAAGAAGAAGGCCGGGCGCAGCAGCAGGGCAGTCGGCCATGGAAGGGCGGCAACG 1078  
*ZmYuc1-de18* CGAAGAAGAAG---GCGGGGCTGCAGCAG---GGCAGTCGTCCATGGAAGGGCGGCAACG 1074  
 \*\*\*\*\*

*ZmYuc1-De18* GGCTCTACTGCGTTGGGCTGGGGATGGCTGGACTGGCTGGCATCTCTCGTGACGCAGTGA 1138  
*ZmYuc1-de18* GGCTCTACTGCGTTGGGCTGGGGATGGCTGGACTGGCTGGCATCTCTCGTGACGCAGTGA 1134  
 \*\*\*\*\*

*ZmYuc1-De18* GCGTTGCTGCGGACATCAAGGCCGCGGTGGATTCCATGGTGGGGCCGCCGGCGTTCTGGT 1198  
*ZmYuc1-de18* GCGTTGCTGCGGACATCAAGGCCGCGGTGGATTCCATGGTGGGGCCGCCGGCGTTCTGGT 1194  
 \*\*\*\*\*

*ZmYuc1-De18* TCTGA 1203  
*ZmYuc1-de18* TCTGA 1199  
 \*\*\*\*\*

(B)

*ZmYuc1-De18* MTEKVLVLIIVGAGPSGLAVAACLGEHGIYPYHIVEREDCSASLWRKRTYDRLKLHLAKEFC 60  
*ZmYuc1-de18* MTEKVLVLIIVGAGPSGLAVAACLGEHGVPHYHIVEREDCSASLWRKRTYDRLKLHLAKEFC 60  
 \*\*\*\*\*

*ZmYuc1-De18* ELPRMSHPSDAPKYITREQFVRYVDDYVERFNILPRYSTSVESCEYDEASGRWDVRRDL 120  
*ZmYuc1-de18* ELPRMSHPSDAPKYITREQFVRYVDDYVERFNILPRYSTSVESCEYDEASGRWDVRRDL 120  
 \*\*\*\*\*

*ZmYuc1-De18* ADGGGRVAEYRTARFLVVATGENCEGVIPIPLRDFPAGEVHSSSYKSWKNYAGKRVLV 180  
*ZmYuc1-de18* ADGGGRVAEYTRFLVVATGENCEGVIPIPLRDFPAGEVHSSSYKSWKNYAGKR--- 177  
 \*\*\*\*\*

*ZmYuc1-De18* VGCGNSGMEIAYDLAYNGVETSLVIRSPVHVMTKGLIYLGMLLKWHLPVKLVDFIILTL 240  
*ZmYuc1-de18* -----ES-----WWLGVATLAWRLHMILP----- 196  
 \*: \*\*: \* \*: \* : \*

*ZmYuc1-De18* ANIQFGDLSRFGIVRPMGPLLLKAKTGRSAVLVVGTTQLIKTGDIKVVGAISRIRGNTV 300  
*ZmYuc1-de18* -----TM 198  
 \*:

*ZmYuc1-De18* EFEDGKERDFDSL VFATGYRSTANTWLKDGGSLLDDNGMPKKKAGPQQQGSRPWKGGNG 360  
*ZmYuc1-de18* EWKP-----PWSVARCML----- 212  
 \*: : . \*\* . . : \*

*ZmYuc1-De18* LYCVGLGMAGLAGISRDAVSVAADIKAAVDSMVGPFAFWF 400  
*ZmYuc1-de18* -----

**Figure S2.** Promoter region of 1491bp of the *Yuc1* gene. Single nucleotide polymorphisms in *de18* compared to *De18* (B37) are marked by asterisks. Deletion and insertion were pointed out by broken lines.

|               |             |            |            |            |            |             |            |   |
|---------------|-------------|------------|------------|------------|------------|-------------|------------|---|
|               | - 1491      |            |            |            |            |             |            |   |
| promoter_B37  | TGCTTCATCC  | TGCTCCCTAT | TATATTTTCA | GGTGGAGATC | AAGAGAGAAT | CACTTCTTAT  | CGATCCCTCC |   |
| promoter_de18 | TGCTTCATCC  | TGCTCCCTAT | TATATTTCCA | GTTGGAGATC | AAGAGAGAAT | CACTTCTTAT  | CAATCCCTCC | * |
|               | - 1421      |            |            |            |            |             |            |   |
| promoter_B37  | TAGGAAACCA  | TTGAAATCAC | TCCATTGGAG | AATCAAGGAG | CAGAATTCAA | GAATCAATCA  | GACAGCGGAG |   |
| promoter_de18 | TAGGAAACCA  | TTGAAATCAC | TCCATTGGAG | AATCAAGGAG | CAGAATTCAA | GAATCAATCA  | GAATTCGGAG | * |
|               | - 1351      |            |            |            |            |             |            |   |
| promoter_B37  | TTCTCCCAA   | CAAGGCCTAA | TAATGGACAT | GTTACAAGAT | GGTGAGGTCC | TCTTAGATAT  | TATACCTTCT |   |
| promoter_de18 | TTCTCCCAA   | CAAGGCCTAA | TAATAGACAT | GTTACAATAT | GATTAATTCC | TCTTAGATAT  | TATACCTTCT |   |
|               | - 1281      |            |            |            |            |             |            |   |
| promoter_B37  | TCATCAATGG  | CAAGTCATGT | AAAATCCAAT | CATC----CA | CACACACATA | TATGTCAAGT  | TCAGTGATTA |   |
| promoter_de18 | TCATCAATGG  | CAAGTCATGT | AAAATCCAAT | CATCCACACA | CACACACACA | TATGTCAAGT  | TCAGTGATTA | * |
|               | - 1211      |            |            |            |            |             |            |   |
| promoter_B37  | CTGGTGTAGT  | AGTGTGAGGA | TTGCATGTGG | CCGGGGAGAT | AAGAATAACA | ACACAAAGTG  | ATAGCAAAGG |   |
| promoter_de18 | CTGGT---GT  | AGTGTGAGGA | TTGCATGTGG | TCAGGGAGAT | AAGAATAACA | ACACAAAATG  | ATAGCAAAGG |   |
|               | - 1141      |            |            |            |            |             |            |   |
| promoter_B37  | AAAACATTAG  | --GTGAGGGC | AGTCAACAAG | GTAGAAGGGT | AATGTTGCTT | ACAAATGTTGA | TTCCTAAGAA |   |
| promoter_de18 | AAAACATTAA  | GCGTGAAGGT | AGTC-ACAAG | GTAGAAGGGT | AATGTTGCTT | ACAAATGTTGA | TTCCTAAGAA | * |
|               | - 1071      |            |            |            |            |             |            |   |
| promoter_B37  | GTTGTTTAGGC | ACAAGACTAG | GT-----AG  | AGAGAAAGAC | ATGGAGTCGA | AGAGTAGTCG  | ATGCACTGCC |   |
| promoter_de18 | GGTGTTTAGGC | ACAAGACTAG | GTAGAGAGAG | AGAGAGAGAG | ATGGAATCGA | AGAGTAGTCG  | ATGCACTGCC |   |
|               | - 1001      |            |            |            |            |             |            |   |
| promoter_B37  | ATATCCAATA  | CGCCGCCACA | TCAACTTGAC | GGAAGGGTAG | AGAGAAGTGT | CATCGAGCAC  | TCGCTTGTGC |   |
| promoter_de18 | ATATCCAATA  | CGCCGCCACA | TCAACTTGAC | GGAAGGGTAG | AGAGAAGTGT | CATCGAGCAC  | TCGATCGTGC | * |
|               | - 931       |            |            |            |            |             |            |   |
| promoter_B37  | GAGGACAAGC  | CGCTATATAT | ACACAAGCGT | AAGATGCGTG | GATGGTTACC | ACGCGCATCG  | TTTACTCGAA |   |
| promoter_de18 | GAGGACAAGC  | CGCTATATAT | ACACAAGCGT | AAGATGCGTG | GATGGTTACC | ACGCGCATCG  | TTTACTCGAA |   |
|               | - 861       |            |            |            |            |             |            |   |
| promoter_B37  | GTTACGTTTA  | TGTGACGTAA | CACAATTGTT | TTATCTTAAT | TTTTTCCAAC | TACAAATTTA  | TATAAGGCAC |   |
| promoter_de18 | GTTACGTTTA  | TGTGACGTAA | CACAATTGTT | TTATCTTAAT | TTTTTCCAAC | TACAAATTTA  | TATAAGGCAC |   |
|               | - 791       |            |            |            |            |             |            |   |
| promoter_B37  | ACGAGAATTT  | GATCTACCAA | AAGAACAAAA | GGATCTCTAG | CCACATTTGT | AAAAGATGTG  | GTGCCGATGC |   |
| promoter_de18 | ACGAGAATTT  | GATCTACCAA | AAGAACAAAA | GGATCTCTAG | CCACATTTGT | AAAAGATGTG  | GTGCCGATGC |   |
|               | - 721       |            |            |            |            |             |            |   |
| promoter_B37  | GTTGGGGACA  | GAGATTCAGA | GGTTTCTCAA | TCTGTGTGAG | AAGATCTCCT | TAATACAATG  | CTCAGGGGCT |   |
| promoter_de18 | GTTGGGGACA  | GAGATTCAGA | GGTTTCTCAA | TCTGTGTGAG | AAGATCTCCT | TAATACAATG  | CTCAGGGGCT |   |
|               | - 651       |            |            |            |            |             |            |   |
| promoter_B37  | GCATTACGCC  | CCGTAGGTCA | TGTTTTTTTA | TATATGGGAG | CATAAGGTGT | TGCGAAAGAT  | TCTACGTGCA |   |
| promoter_de18 | GCATTACGCC  | CCGTAGGTCA | TGTTTTTTTA | TATATGGGAG | CATAAGGTGT | TGCGAAAGAT  | TCTACGTGCA |   |
|               | - 581       |            |            |            |            |             |            |   |
| promoter_B37  | ATAGAGGAAA  | TTTCAAACAA | TGAAGGCGTG | GTTACATTAT | GTGGTTGTTC | TAGCAATGAG  | TATAAGTGAA |   |
| promoter_de18 | ATGAGGAAA   | TTTCAAACAA | TGAAGGCGTG | GTTACATTAT | GTGGTTTTC  | -----       | -----      | * |
|               | - 511       |            |            |            |            |             |            |   |
| promoter_B37  | TTGTTTGAAT  | TAAAGAATTT | GTTGTATGTG | TTTGAACTT  | TGAATGGAAC | CCCACACTAA  | GGTTTTAAAA |   |
| promoter_de18 | -----       | -----      | -----      | -----      | -----      | -----       | -----      |   |
|               | - 441       |            |            |            |            |             |            |   |
| promoter_B37  | AATGTGCATA  | CTGTTTAACT | TGCATTATTA | TAGGTTTAAT | TTTCCAATAT | AGGTACTTTT  | AAATTTAATA |   |
| promoter_de18 | -----       | -----      | -----      | -----      | -----      | -----       | -AATTTAATA |   |
|               | - 371       |            |            |            |            |             |            |   |
| promoter_B37  | GAACCTCAAA  | AAAGAATTTA | AAGTATACAT | ATAACTTTAT | ATGATAAAGA | ATGGATATAT  | AGATAATTAC |   |
| promoter_de18 | GAACCTCAAA  | AAAGAATTTG | AAGTATAC-- | ATAACTTTAT | ATGATAAAGA | ATGGATATGT  | AGATAATTAC | * |
|               | - 301       |            |            |            |            |             |            |   |
| promoter_B37  | TGGCCGGAAG  | ATTCCATCCA | CCTCAATTAA | TGACATCATA | AATGTAAGGG | ATATATAATC  | ATCTAAACAT |   |
| promoter_de18 | CGGCCGGAAG  | ATTCCATCCA | CCTCAATTAA | TGACATCATA | AATGTAGGAG | ATAGATAAAT  | ATCTAAACAT | * |
|               | - 231       |            |            |            |            |             |            |   |
| promoter_B37  | TGCTTAACGT  | TCACACTAAA | GCCCTGTTTG | GGAACAAAGT | TTTTGAAAAC | CAAAGTATTT  | GAAATACTAT |   |
| promoter_de18 | TGCTTAACGT  | TCACACTAAG | GCCCTGTTTA | GGAACAAAAT | TTTTGAAAAA | CACAGTATTT  | GAAATACTAC | * |
|               | - 161       |            |            |            |            |             |            |   |
| promoter_B37  | AAGATACTTT  | AGTCAAGACA | ATATTATAGT | TTAAAATACT | ACAGTTTAA  | AAATGAGGT   | CCAGACTTAA |   |
| promoter_de18 | AAGATACTTT  | AGTCAATACA | ATGCTATAGT | TTAAAATACT | ACAGTTTAA  | AAACTGAGGT  | CCAGACTTAA | * |
|               | - 91        |            |            |            |            |             |            |   |
| promoter_B37  | AGTTCCTTAA  | AACAA-GGGG | ACATATACGT | CAATGCACAT | AGCCCTGCTG | TTTGTACTAT  | AAATGGACCC |   |
| promoter_de18 | AGTTCCTTAA  | AACAAGGGGG | ACAGATACGT | CAATGCACAT | AGCCCTGCTG | TTTGTACTAT  | AAATGGACCC | * |
|               | - 21        |            |            |            |            |             |            |   |
| promoter_B37  | ACTCATCAT-  | ----CATAAG | C          |            |            |             |            |   |
| promoter_de18 | ACTCATCATC  | ATAACATAAG | C          |            |            |             |            |   |
